# Supplementary material for: Mode-specific effects of concentric and eccentric isokinetic training of the hamstring muscle at slow angular velocity on the functional hamstrings-to-quadriceps ratio-a randomized trial
Source: PeerJ. 2022 Sep 29;10:e13842. doi: 10.7717/peerj.13842 (PMC9527019; doi:10.7717/peerj.13842)
Supplement: Supplemental Information 1 [file peerj-10-13842-s001.xlsx]

## Sheet: Sheet1
Group	Age (years)	Ht (cm)	Height (m)	Height (m2)	Wt (lb)	Weight (Kg)	BMI (Kg/m2)	PT H Baseline	PT H Post	PT Q baseline	PT Q Post	TPT H Baseline	TPT H Post	TPT Q Baseline	TPT Q Post	AT H Baseline	AT H Post	DT H Baseline	DT H Post	AT Q Baseline	AT Q Post	DT Q baseline	DT Q Post	H/Q ratio Baseline	H/Q ratio Post
1	25	176	1.76	3.0976	184.8	83.8238	27.0609	118.4	173.7	186.2	202.8	830	990	440	400	90	50	250	370	90	30	930	840	0.635875	0.856509
1	21	165	1.65	2.7225	130	58.967	21.6591	112.2	124.8	149.7	148.6	1030	630	460	420	50	40	380	340	40	40	890	450	0.749499	0.839838
1	24	180	1.8	3.24	182.6	82.8259	25.5635	160.8	203.5	193.8	203.7	1080	1230	470	640	90	100	290	350	40	40	190	350	0.829721	0.999018
1	25	167	1.67	2.7889	122	55.3382	19.8423	94.4	110.6	160.3	155.5	830	890	430	330	140	50	390	420	40	20	340	590	0.588896	0.711254
1	26	173	1.73	2.9929	181.7	82.4177	27.5377	140.2	167.9	173	191.3	1110	1040	440	430	60	30	410	380	50	50	2960	2550	0.810405	0.877679
1	23	180	1.8	3.24	140	63.5029	19.5997	112	118.7	130.4	133.9	1100	1080	400	320	190	60	390	300	70	60	1970	2140	0.858896	0.886482
1	24	178	1.78	3.1684	156	70.7604	22.3331	129.1	115.1	150.8	139.2	1010	1080	600	350	80	60	340	400	110	60	310	480	0.856101	0.826868
1	26	170	1.7	2.89	132	59.8741	20.7177	99.2	122.6	157.4	150	740	980	370	340	40	30	420	320	40	30	1240	1240	0.630241	0.817333
1	26	168	1.68	2.8224	132	59.8741	21.2139	102.9	146.6	156.1	160.2	960	920	490	430	90	50	430	340	50	30	410	890	0.659193	0.915106
1	25	180	1.8	3.24	169.4	76.8385	23.7156	121.9	168.4	179.1	179.8	1130	1040	450	460	90	50	300	380	30	40	330	690	0.680625	0.936596
1	23	166	1.66	2.7556	165	74.8427	27.1602	124.4	141.7	183.3	180.4	1100	1060	240	430	150	60	240	310	30	30	610	650	0.678669	0.785477
1	26	168	1.68	2.8224	137	62.1421	22.0175	100.6	119.8	134.4	122	810	1180	500	420	60	80	270	370	50	40	1320	620	0.748512	0.981967
1	23	167	1.67	2.7889	130	58.967	21.1434	100.5	119.5	137.7	130	990	1080	460	540	80	60	400	450	30	40	430	1350	0.729847	0.919231
1	23	182	1.82	3.3124	160	72.5747	21.91	134.9	205.8	146.4	209.5	1130	1080	520	340	120	30	310	500	100	30	270	190	0.921448	0.982339
1	24	170	1.7	2.89	134	60.7813	21.0316	145.1	145.1	194.1	194.1	840	840	440	440	40	40	320	320	30	30	190	190	0.747553	0.747553
2	25	172	1.72	2.9584	136	61.6885	20.852	77.8	106.4	139.2	135.8	890	1050	430	470	110	60	390	340	70	50	1120	1080	0.558908	0.783505
2	25	165	1.65	2.7225	136	61.6885	22.6588	83.1	107.5	128.3	163	1070	1000	590	420	140	200	390	360	50	50	720	700	0.647701	0.659509
2	26	164	1.64	2.6896	118.8	53.8867	20.0352	103.7	112.4	124.5	131	1240	1210	630	610	150	120	390	400	60	40	920	310	0.832932	0.858015
2	25	170	1.7	2.89	130	58.967	20.4038	98.1	126.5	129.4	126.1	1260	1000	400	360	180	110	300	320	70	80	2020	610	0.758114	1.00317
2	25	182	1.82	3.3124	160	72.5747	21.91	160.6	158.6	220.6	219.3	1190	1170	600	540	30	30	500	400	90	40	470	220	0.728015	0.72321
2	26	167	1.67	2.7889	132	59.8741	21.4687	81.3	111.4	128.9	140.2	1090	1140	350	430	170	60	420	310	60	40	1980	1010	0.630721	0.794579
2	26	166	1.66	2.7556	148	67.1316	24.3619	137.3	146.8	170.5	157.6	1020	1120	350	480	80	40	390	390	40	50	420	250	0.805279	0.931472
2	22	166	1.66	2.7556	165	74.8427	27.1602	153.2	157.9	209.5	204.8	890	1130	380	330	50	80	350	400	30	30	400	480	0.731265	0.770996
2	25	170	1.7	2.89	132	59.8741	20.7177	65.7	97.8	81.3	123.8	860	770	690	690	130	40	400	340	70	40	900	870	0.808118	0.789984
2	26	170	1.7	2.89	142	64.4101	22.2872	122.9	126.6	161.8	171.5	860	980	470	470	120	80	340	310	50	30	1400	1090	0.75958	0.738192
2	26	180	1.8	3.24	165	74.8427	23.0996	161.6	176	182.6	213.9	1270	1170	460	460	40	40	460	410	50	40	770	700	0.884995	0.822814
2	23	171	1.71	2.9241	136	61.6885	21.0966	122.3	127.4	142.9	144.7	970	480	420	510	100	50	320	380	40	30	500	910	0.855843	0.880442
2	25	168	1.68	2.8224	158	71.6675	25.3924	142.3	172.1	150	153.5	1120	1220	560	540	90	70	320	440	60	40	660	620	0.948667	1.12117
2	24	175	1.75	3.0625	165	74.8427	24.4384	131.5	138.1	140.8	142.3	880	580	610	640	110	60	370	430	70	60	860	500	0.933949	0.970485
2	25	168	1.68	2.8224	136	61.6885	21.8568	88.7	88.7	137.3	137.3	950	950	480	480	180	180	400	400	50	50	970	970	0.646031	0.646031
